# Supplementary material for: CYCLON and NPM1 Cooperate within an Oncogenic Network Predictive of R-CHOP Response in DLBCL
Source: MDPI journal article supplement (doi:10.3390/cancers13235900), 2021-11-24
Supplement: s1 [file s1]

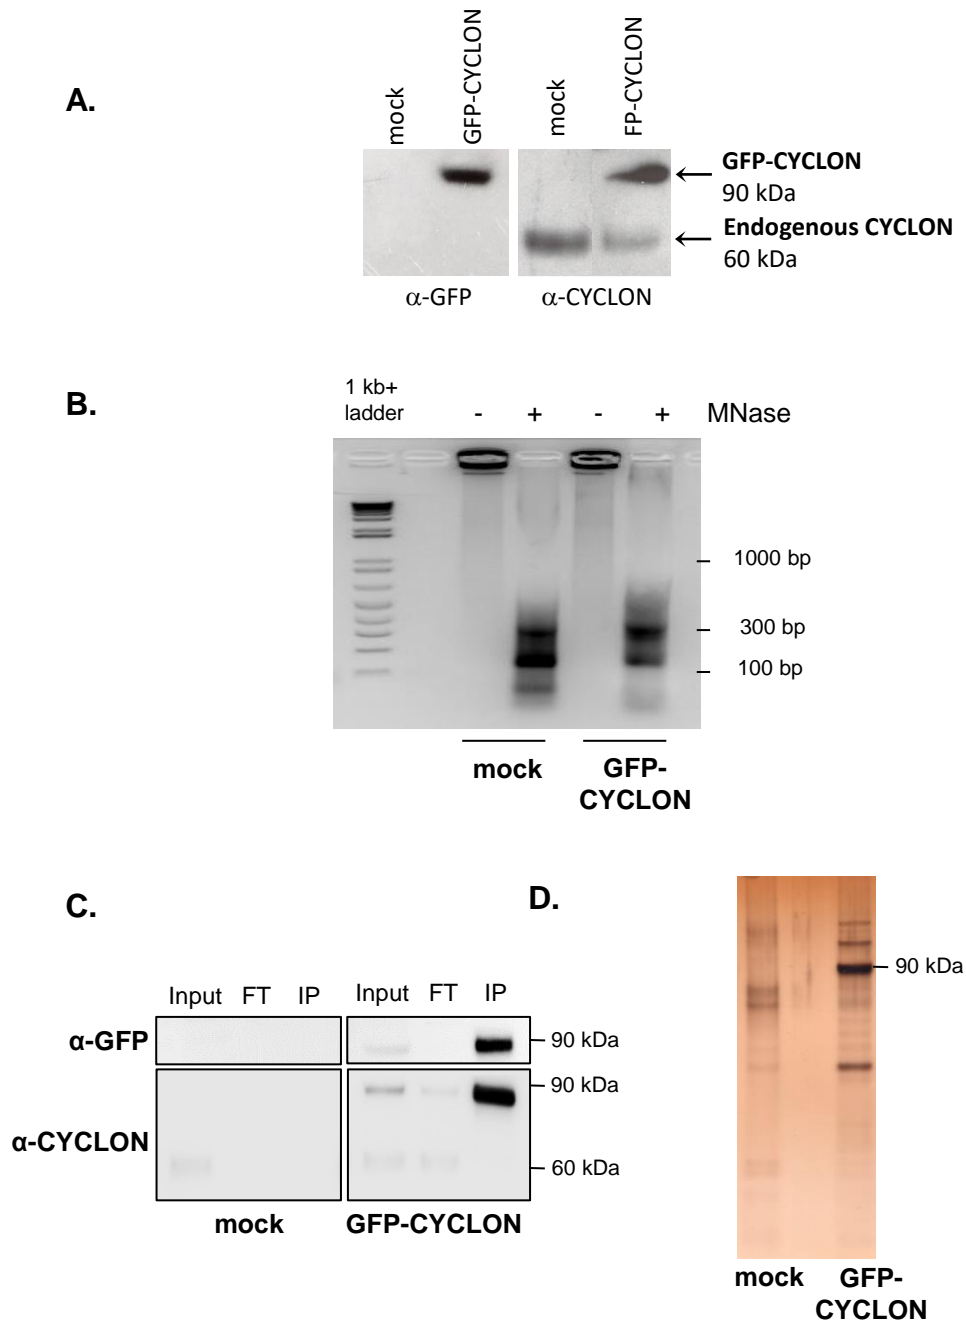

**Figure S1: Experimental approach for identification of CYCLON protein-protein interaction network in B593 DLBCL cell line.** **A.** Immunoblot analysis of B593 mock and GFP-CYCLON cells using anti-GFP and anti-CYCLON antibody. **B.** Agarose gel electrophoresis showing nucleic acids profiles before (-) and after (+) MNase digestion used to solubilize CYCLON-associated complexes. **C.** Western blot analysis of CYCLON and CYCLON-GFP in input, flow-through (FT, eq 1 volume) and GFP-Trap immunoprecipitated (IP, eq. 10 volumes) fractions as indicated. **D.** Representative silver staining of the GFP-Trap immunoprecipitated fraction in B593 mock and GFP-CYCLON cell lines.

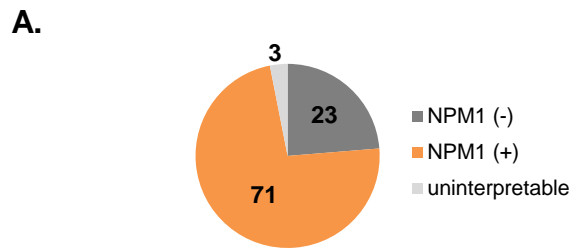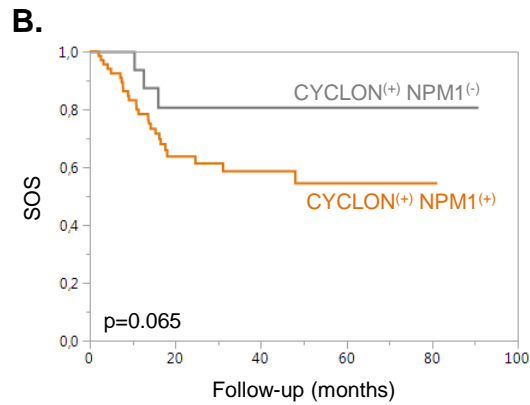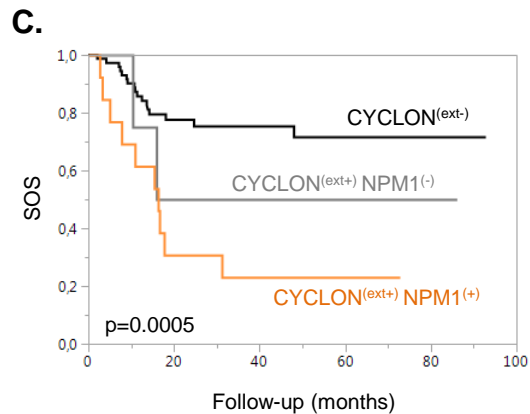

**Figure S2: NPM1 IHC evaluation in DLBCL reveals an association of CYCLON/NPM1 double positivity with prognosis.** **A.** Pie-chart representation of NPM1 positivity determined by IHC staining in a DLBCL cohort (n=97). **B.** Kaplan-Meier analysis of SOS associated with CYCLON single expressor (CYCLON<sup>(+)</sup> NPM1<sup>(-)</sup>) or CYCLON/NPM1 double expressors (CYCLON<sup>(+)</sup> NPM1<sup>(+)</sup>). **C.** Kaplan-Meier analysis of SOS associated with CYCLON non extra-nucleolar (CYCLON<sup>(ext-)</sup>), CYCLON extra-nucleolar pattern/NPM1 negative (CYCLON<sup>(ext+)</sup> NPM1<sup>(-)</sup>) or CYCLON extra-nucleolar pattern/NPM1 double expressors (CYCLON<sup>(ext+)</sup> NPM1<sup>(+)</sup>). p values are derived from a log rank test.

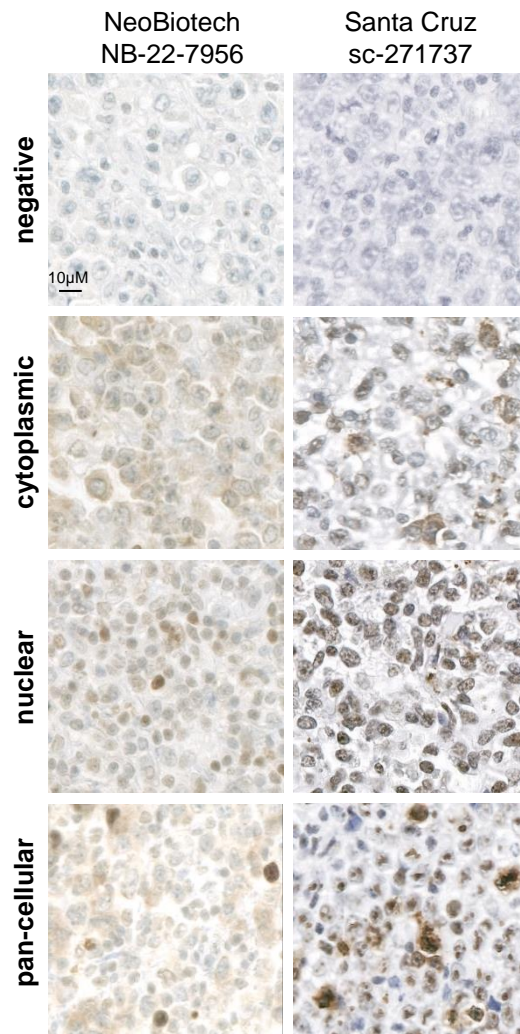

**Figure S3. Validation of NPM1 staining patterns using an alternative antibody.** IHC analysis performed on 26 DLBCL cases using 2 distinct mouse monoclonal antibodies (NeoBiotech clone 7H10B9 #NB-22-7956 and Santa Cruz #sc-271737) gave similar results, confirming the validity of NPM1 alternative localizations in DLBCL. Four representative cases are presented.

**A.**

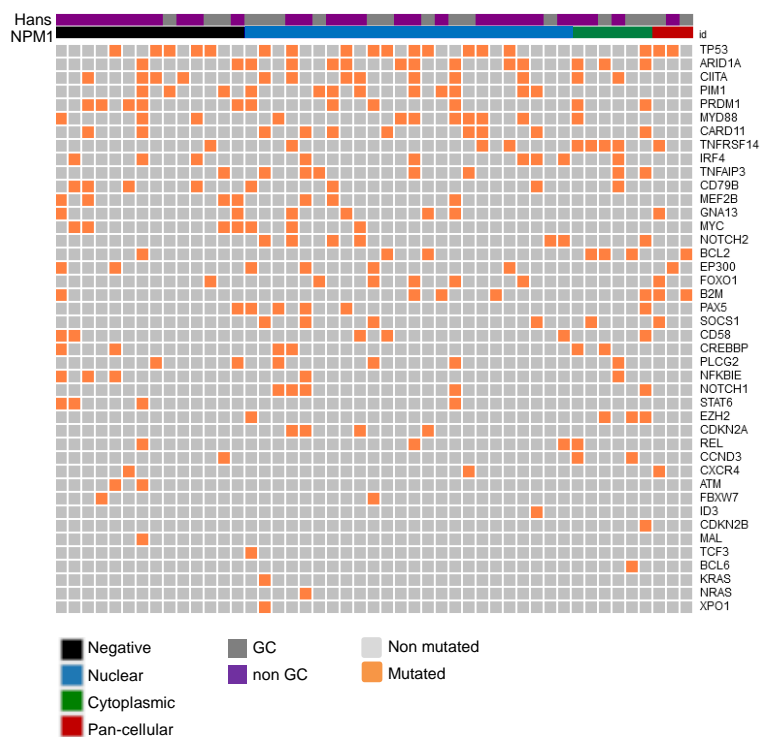

**B.**

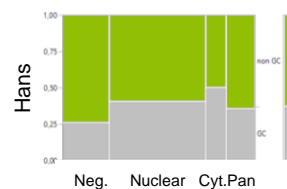

**C.**

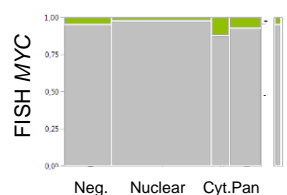

**D.**

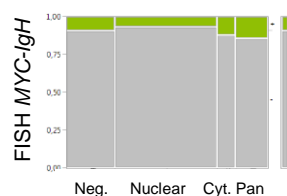

**E.**

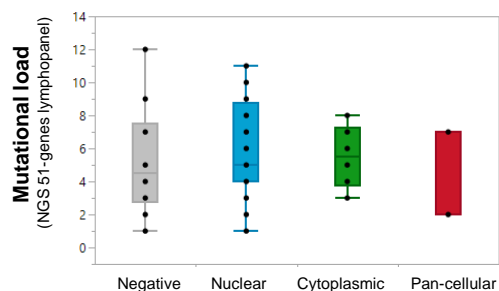

**F.**

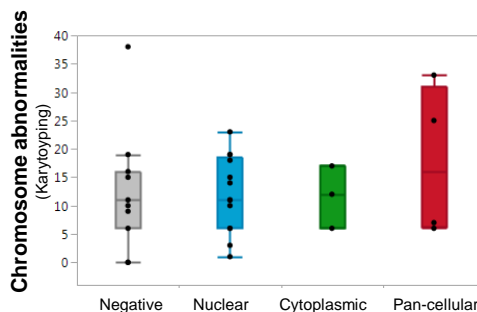

**Figure S4. Investigation of genetic abnormalities according to NPM1 staining patterns.** **A.** Heatmap representation of mutational profiles derived from NGS targeted sequencing (n=48) including 51 genes sorted by mutation frequency as indicated. **B-D.** Mosaic plots between NPM1 staining pattern and Hans non-GC/GC classification (B, n=97), *MYC* rearrangement (C, n=87), *MYC-IgH* rearrangement (D, n=87). **E-F.** Boxplot representation of mutational load (E, n=47) and number of chromosome abnormalities (F, n=38) for each NPM1 staining patterns.

**A.**

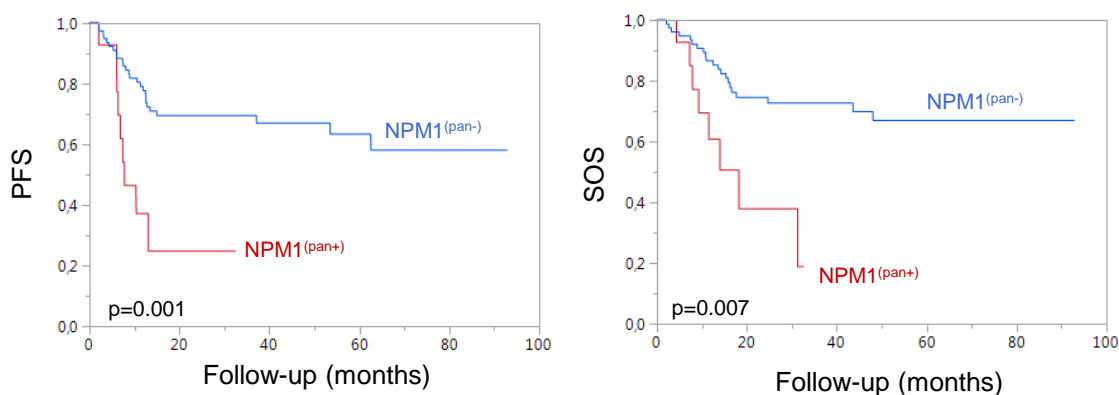

**B.**

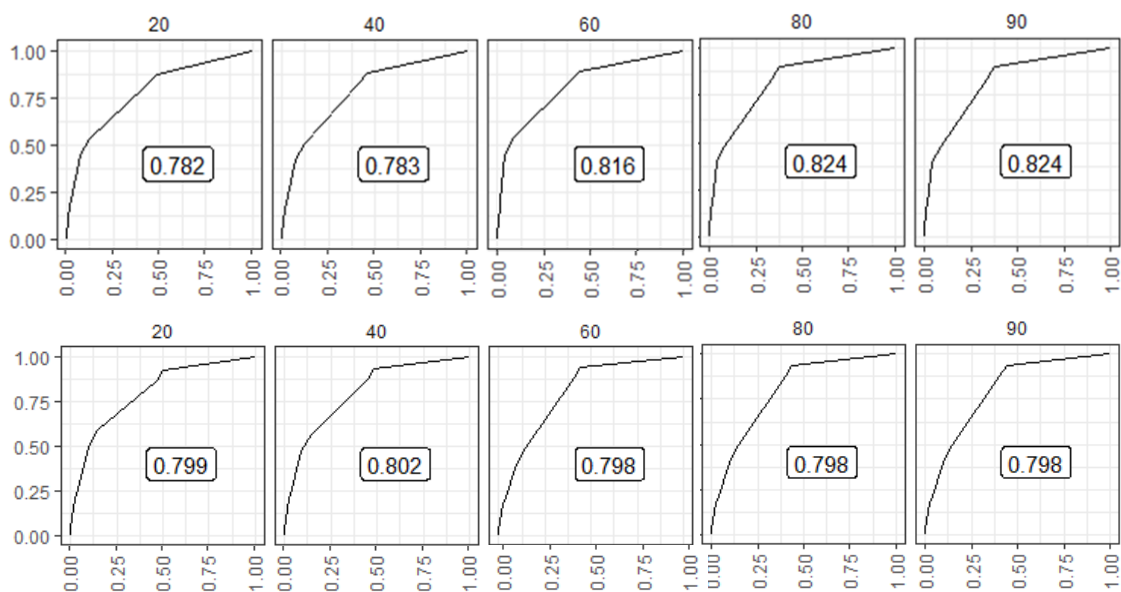

**Figure S5: NPM1 pan-cellular staining (NPM1<sup>(pan+)</sup>) defines a very poor prognosis group among DLBCL patients.** **A.** Kaplan-Meier analyses of PFS (left) and SOS (right) associated with pan-cellular NPM1 staining (NPM1<sup>(pan+)</sup>) and non pan-cellular NPM1 staining (NPM1<sup>(pan-)</sup>). **B.** Time-dependent receiver operating characteristic (ROC) curves evaluating prediction accuracy of multivariate bootstrap Cox regression analysis of NPM1, CYCLON and R-IPI (Table 2) over time (20, 40, 60, 80 and 90 months as indicated). x axis: false positive rate, y axis: true positive rate. Box: area under the curve (AUC) for multivariate PFS (upper panel) and OS (lower panel) models.

Original\_western\_blot

Réf: BioRad  
161-0374

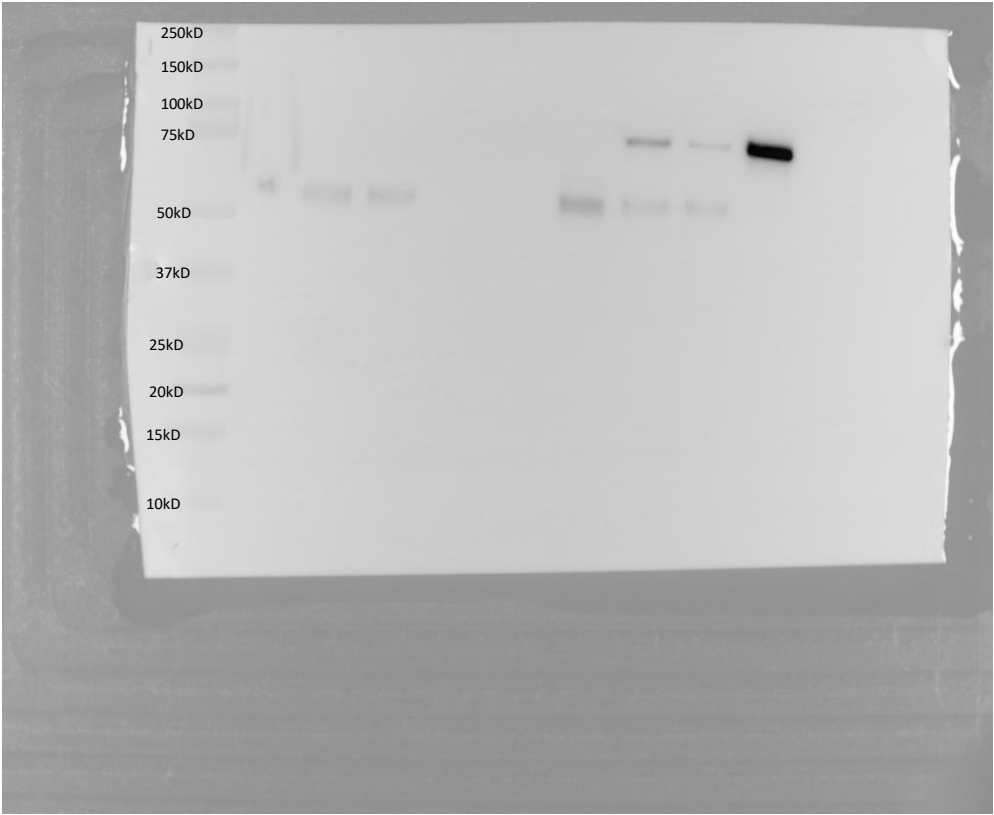

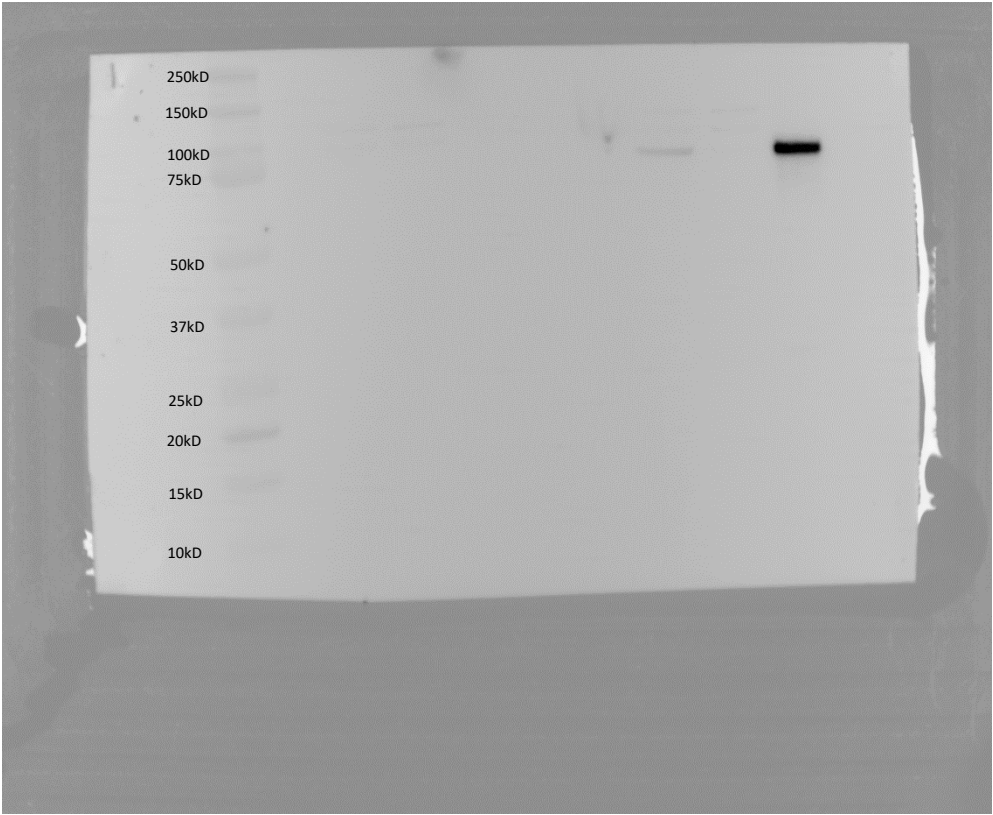

Table S1 : CYCLON interactome in B593 cells

This table lists proteins found significantly more abundant (log<sub>2</sub>(Fold Change) ≥ 1.5 ; p-value ≤ 0.05) in eluates from GFP-Cyclon compared to control immunoprecipitations.

| accession    | protein name                                                                         | gene name | Mol. Weight | Identified peptides | coverage (%) | log <sub>2</sub> (Fold Change CYCLON/CTL) | p-value  | abundance CTL1 | abundance CTL2 | abundance CTL3 | abundance Cyclon1 | abundance Cyclon2 | abundance Cyclon3 |
|--------------|--------------------------------------------------------------------------------------|-----------|-------------|---------------------|--------------|-------------------------------------------|----------|----------------|----------------|----------------|-------------------|-------------------|-------------------|
| CCD86_HUMAN  | Coiled-coil domain-containing protein 86                                             | CCDC86    | 40236       | 21                  | 50.28        | 11.57                                     | 2.61E-08 | 14.84335724    | 14.85226645    | 14.71945751    | 26.82049972       | 27.02233966       | 25.27892001       |
| B1B1J6_HUMAN | Chemokine-like protein TAF4-5 (Fragment)                                             | TAF45     | 19689       | 1                   | 4.97         | 7.15                                      | 4.20E-04 | 14.84335724    | 14.85226645    | 14.71945751    | 24.6809757        | 22.87983925       | 18.29600344       |
| DHX9_HUMAN   | ATP-dependent RNA helicase A                                                         | DHX9      | 140958      | 32                  | 24.65        | 6.52                                      | 1.12E-04 | 19.05211055    | 19.31978048    | 20.0429251     | 28.53570988       | 24.97127383       | 24.47450116       |
| B3KTW4_HUMAN | cDNA FLJ38868 fis, clone MESAN2013211, highly similar to Protein FAM98A              | FAM98A    | 37260       | 1                   | 2.25         | 5.58                                      | 1.14E-03 | 14.84335724    | 14.85226645    | 14.71945751    | 22.71550264       | 21.24375906       | 17.20094317       |
| Q59EC0_HUMAN | Adenosine deaminase, RNA-specific isoform ADAR-a variant (Fragment)                  | DSRAD     | 137833      | 21                  | 17.68        | 5.51                                      | 9.47E-04 | 19.23409719    | 15.33922293    | 18.67450145    | 25.20755392       | 22.27234265       | 22.29081667       |
| ALBUJ_HUMAN  | Serum albumin                                                                        | ALB*      | 69367       | 18                  | 25.62        | 5.40                                      | 1.19E-03 | 21.8966324     | 21.40461257    | 23.72059441    | 29.87569185       | 28.29568509       | 25.04383951       |
| U2AFM_HUMAN  | U2 small nuclear ribonucleoprotein auxiliary factor 35 kDa subunit-related protein 2 | ZRSR2     | 58045       | 1                   | 1.66         | 4.98                                      | 1.45E-04 | 14.84335724    | 14.85226645    | 14.71945751    | 20.91474523       | 20.26520537       | 18.17025965       |
| RT22_HUMAN   | 28S ribosomal protein S22, mitochondrial                                             | MRPS22    | 41280       | 4                   | 9.17         | 4.92                                      | 2.81E-04 | 15.0717662     | 15.4782971     | 14.53293325    | 18.30176323       | 21.55375815       | 19.9767098        |
| ROAO_HUMAN   | Heterogeneous nuclear ribonucleoprotein A0                                           | HNRNPA0   | 30841       | 1                   | 5.57         | 4.56                                      | 9.44E-05 | 14.84335724    | 14.85226645    | 14.71945751    | 19.05011822       | 18.66801153       | 20.37442415       |
| 5NT1B_HUMAN  | Cytosolic 5'-nucleotidase 1B                                                         | NT5C1B    | 68804       | 1                   | 1.31         | 4.49                                      | 3.49E-02 | 14.84335724    | 14.85226645    | 14.71945751    | 22.82586426       | 21.06170345       | 14.00296406       |
| TRIM5_HUMAN  | Tripartite motif-containing protein 5                                                | TRIM5     | 56338       | 1                   | 1.42         | 4.11                                      | 1.13E-03 | 16.0500409     | 17.5703621     | 16.14148191    | 21.5901322        | 21.53946827       | 18.95034607       |
| ILF3_HUMAN   | Interleukin enhancer-binding factor 3                                                | ILF3      | 95338       | 8                   | 8.28         | 3.62                                      | 5.89E-03 | 18.30047604    | 18.05094648    | 17.15730549    | 23.83979558       | 19.78927529       | 20.73779232       |
| PTCD3_HUMAN  | Pentatricopeptide repeat domain-containing protein 3, mitochondrial                  | PTCD3     | 78550       | 2                   | 2.61         | 3.49                                      | 2.94E-03 | 14.84335724    | 14.85226645    | 14.71945751    | 16.40070981       | 19.55047175       | 18.9320219        |
| RALY_HUMAN   | RNA-binding protein Raly                                                             | RALY      | 32463       | 2                   | 5.56         | 3.27                                      | 1.84E-03 | 16.86690815    | 14.96208474    | 17.10159095    | 19.72018243       | 19.42733062       | 19.60235327       |
| NCOA5_HUMAN  | Nuclear receptor coactivator 5                                                       | NCOA5     | 65536       | 4                   | 7.43         | 3.25                                      | 1.25E-02 | 18.00318141    | 17.58127188    | 14.70730157    | 21.67939816       | 19.34718217       | 19.00977799       |
| SSBP_HUMAN   | Single-stranded DNA-binding protein, mitochondrial                                   | SSBP1     | 17260       | 3                   | 21.62        | 2.95                                      | 3.54E-03 | 16.94688099    | 18.60620875    | 16.77132937    | 20.97500645       | 20.43971944       | 19.76546454       |
| RL11_HUMAN   | 60S ribosomal protein L11                                                            | RPL11     | 20252       | 3                   | 16.29        | 2.78                                      | 4.29E-03 | 18.32091105    | 17.12476226    | 18.79563625    | 21.59057075       | 20.51693802       | 20.47023662       |
| HNRH2_HUMAN  | Heterogeneous nuclear ribonucleoprotein H2                                           | HNRNPH2   | 49264       | 5                   | 14.25        | 2.73                                      | 3.06E-02 | 20.44923474    | 16.94117843    | 20.91502763    | 21.94169259       | 23.21112773       | 21.35494349       |
| CSK21_HUMAN  | Casein kinase II subunit alpha                                                       | CSNK2A1   | 45144       | 1                   | 1.79         | 2.73                                      | 7.12E-03 | 13.84558736    | 14.21696396    | 13.34713151    | 17.96307582       | 15.9428699        | 15.68340796       |
| CHAP1_HUMAN  | Chromosome alignment-maintaining phosphoprotein 1                                    | CHAMP1    | 89099       | 4                   | 5.67         | 2.49                                      | 4.20E-02 | 17.89212686    | 17.36651422    | 16.99545351    | 22.51099737       | 18.70766506       | 18.4938012        |
| NPM_HUMAN    | Nucleophosmin                                                                        | NPM1      | 32575       | 11                  | 40.82        | 2.41                                      | 4.05E-02 | 22.97270302    | 19.58807703    | 22.55617841    | 25.38420401       | 23.30362209       | 23.65071285       |
| YLP1M1_HUMAN | YLP motif-containing protein 1                                                       | YLP1M1    | 219985      | 3                   | 2.41         | 2.41                                      | 1.87E-02 | 16.99543643    | 16.93687184    | 16.92424308    | 20.74003865       | 17.70314188       | 19.63437325       |
| HNRPC_HUMAN  | Heterogeneous nuclear ribonucleoproteins C1/C2                                       | HNRNPC    | 33670       | 9                   | 27.12        | 2.37                                      | 8.08E-03 | 21.8359899     | 20.93343331    | 22.33927475    | 23.93934899       | 23.65740443       | 24.63047657       |
| HNRH3_HUMAN  | Heterogeneous nuclear ribonucleoprotein H3                                           | HNRNPH3   | 36926       | 6                   | 19.08        | 2.34                                      | 4.92E-02 | 19.36035324    | 16.68450736    | 20.58117744    | 20.57301908       | 20.69349127       | 22.3880408        |
| RM38_HUMAN   | 39S ribosomal protein L38, mitochondrial                                             | MRPL38    | 44597       | 1                   | 2.63         | 2.24                                      | 1.75E-02 | 14.84335724    | 14.85226645    | 14.71945751    | 15.85904084       | 18.30247299       | 16.96138363       |
| RM50_HUMAN   | 39S ribosomal protein L50, mitochondrial                                             | MRPL50    | 18325       | 2                   | 15.19        | 2.18                                      | 1.57E-02 | 15.8967047     | 16.32832488    | 15.33480242    | 17.41321501       | 19.09088203       | 17.59929303       |
| KHDR1_HUMAN  | KH domain-containing, RNA-binding, signal transduction-associated protein 1          | KHDRBS1   | 48227       | 2                   | 5.42         | 2.13                                      | 1.81E-02 | 18.5462055     | 16.55495408    | 16.96493023    | 19.72022887       | 19.41293331       | 19.33193009       |
| RT27_HUMAN   | 28S ribosomal protein S27, mitochondrial                                             | MRPS27    | 47611       | 2                   | 4.83         | 2.09                                      | 3.01E-02 | 18.24532131    | 16.15215068    | 17.77884251    | 18.54859064       | 20.3131386        | 19.59284667       |
| NH2L1_HUMAN  | NHP2-like protein 1                                                                  | SNU13     | 14174       | 3                   | 25           | 2.04                                      | 3.25E-02 | 17.55394951    | 16.21566771    | 17.42564215    | 20.04557047       | 17.78512403       | 19.49181917       |
| RS14_HUMAN   | 40S ribosomal protein S14                                                            | RPS14     | 16273       | 2                   | 15.89        | 1.97                                      | 4.30E-02 | 16.48732461    | 17.70212005    | 15.86502747    | 17.72218187       | 19.97174659       | 18.26068276       |
| MATR3_HUMAN  | Matrin-3                                                                             | MATR3     | 94623       | 6                   | 6.38         | 1.95                                      | 1.88E-02 | 19.95500585    | 18.61726312    | 19.27685771    | 21.25401284       | 21.45519384       | 20.97852671       |
| HNRPU_HUMAN  | Heterogeneous nuclear ribonucleoprotein U                                            | HNRNPU    | 90584       | 4                   | 5.82         | 1.84                                      | 2.13E-02 | 16.6066174     | 15.86923338    | 16.74380347    | 18.48122202       | 17.96977138       | 18.3454814        |
| ARHGH_HUMAN  | Rho guanine nucleotide exchange factor 17                                            | ARHGEF17  | 221673      | 1                   | 0.39         | 1.79                                      | 4.14E-02 | 18.69410592    | 18.81672094    | 17.76979465    | 20.82974159       | 20.69417241       | 19.11284309       |
| IF4A3_HUMAN  | Eukaryotic initiation factor 4A-III                                                  | EIF4A3    | 46871       | 4                   | 8.52         | 1.73                                      | 3.70E-02 | 17.01552631    | 17.9476555     | 18.14697472    | 18.99669479       | 19.15455293       | 20.14176801       |

Legend :

- imputed values for values totally missing in the condition
- imputed value for partially missing value in the condition

\*ALB was excluded from the final list for graphical representation and ontology analysis as a very likely contaminant protein
